# Supplementary material
Source: MDPI journal article supplement (https://www.mdpi.com/2071-1050/12/6/2240)
Supplement: s1 [file s1]

**Table S1** Mean ratings of items in agricultural production dimension

| <b>Agricultural production</b>                                  | <b>Mean</b> | <b>Standard Deviation</b> |
|-----------------------------------------------------------------|-------------|---------------------------|
| My yield has increased a lot.                                   | 5.46        | 0.79                      |
| I have produced higher quality rice.                            | 4.63        | 1.01                      |
| Rice farming has become more difficult. *                       | 1.24        | 0.60                      |
| Working on farm is not as hard anymore.                         | 5.07        | 1.21                      |
| I have been able to save money due to avoided production costs. | 5.28        | 0.76                      |
| I spent more money to pay on production costs. *                | 1.25        | 0.62                      |
| My fertilizer use has decreased.                                | 5.45        | 0.74                      |
| I now apply more fertilizer at a later growth stage. +          | 5.45        | 1.13                      |

Note: N = 142, 6-point Likert-type scale question format. \* item was reverse coded for mean calculation.

+ item was deleted for further analysis.

**Table S2** Mean ratings of items in physical capital dimension

| <b>Physical capital</b>                                  | <b>Mean</b> | <b>Standard. Deviation</b> |
|----------------------------------------------------------|-------------|----------------------------|
| I have been able to buy new farming equipment.           | 3.15        | 1.80                       |
| I have been able to upgrade or build new farm buildings. | 2.28        | 1.48                       |
| I rent more land for rice production.                    | 2.47        | 1.40                       |
| I was able to have my house renovated and improved.      | 2.47        | 1.63                       |
| I have been able to build a new house.                   | 3.05        | 1.96                       |

Note: N = 142, 6-point Likert-type scale question format

**Table S3** Mean ratings of items in social capital dimension

| <b>Social capital</b>                                                                            | <b>Mean</b> | <b>Standard. Deviation</b> |
|--------------------------------------------------------------------------------------------------|-------------|----------------------------|
| I can now provide advice to fellow farmers on how to improve their farming practices.            | 4.89        | 1.06                       |
| I can now organize farmers into groups to work together to improve farming practices.            | 4.76        | 1.25                       |
| I can now communicate with other farmers about my experience in using best management practices. | 5.29        | 0.77                       |

Note: N = 142, 6-point Likert-type scale question format

**Table S4** Mean ratings of items in human capital dimension

| <b>Human capital</b>                                            | <b>Mean</b> | <b>Standard. Deviation</b> |
|-----------------------------------------------------------------|-------------|----------------------------|
| I have gained a lot of knowledge.                               | 5.25        | 0.76                       |
| I have been able to provide better workforce.                   | 5.01        | 0.88                       |
| I have changed my farming habits.                               | 4.97        | 1.19                       |
| I am now able to express concerns about my farming practices. + | 4.68        | 1.34                       |

Note: N = 142, 6-point Likert-type scale question format, + item was deleted for further analysis.

**Table S5** Mean ratings of items in health dimension

| <b>Health</b>                            | <b>Mean</b> | <b>Standard. Deviation</b> |
|------------------------------------------|-------------|----------------------------|
| My health has improved a lot.            | 5.03        | 1.02                       |
| I have more health issues. *             | 1.23        | 0.68                       |
| My family members have become healthier. | 5.10        | 0.82                       |

Note: N = 142, 6-point Likert-type scale question format, \* item was reverse coded for mean calculation.

**Table S6** Mean ratings of items in poverty dimension

| <b>Poverty</b>                                       | <b>Mean</b> | <b>Standard. Deviation</b> |
|------------------------------------------------------|-------------|----------------------------|
| I can buy fashionable clothes for my children.       | 4.47        | 1.08                       |
| I was able to buy a mobile phone.                    | 4.81        | 1.20                       |
| I was able to buy new furniture for the family home. | 3.79        | 1.60                       |
| I have more money than before.                       | 4.89        | 0.68                       |
| I have lost a lot of money. *                        | 1.20        | 0.60                       |

Note: N = 142, 6-point Likert-type scale question format, \* item was reverse coded for mean calculation and deleted for further analysis.

**Table S7** Mean ratings of items in natural capital dimension

| <b>Natural capital</b>                                    | <b>Mean</b> | <b>Standard. Deviation</b> |
|-----------------------------------------------------------|-------------|----------------------------|
| I see more wasps in my fields. <sup>1</sup>               | 2.71        | 1.55                       |
| I see less flies in my fields. <sup>1,*</sup>             | 4.58        | 1.37                       |
| There are more dragonflies in my fields. <sup>1</sup>     | 2.93        | 1.48                       |
| I have seen less birds around my fields. <sup>2,*,+</sup> | 2.39        | 1.68                       |
| I have seen less frogs in my fields. <sup>2,*</sup>       | 3.64        | 1.64                       |
| There are more fish in my fields. <sup>2</sup>            | 3.11        | 1.70                       |
| I have seen more bats in my fields. <sup>2</sup>          | 3.69        | 1.33                       |
| I have seen less snakes in my fields. <sup>2,*</sup>      | 3.62        | 1.45                       |
| I have seen less spiders in my fields. <sup>1,*</sup>     | 4.24        | 1.31                       |
| There are more trees and shrubs on my farm.               | 2.59        | 1.24                       |
| There are more wildflowers around my fields.              | 2.80        | 1.31                       |

Note: N = 142, 6-point Likert-type scale question format with species corresponding pictures.

<sup>1</sup> invertebrate species, <sup>2</sup> vertebrate species. \* item was reverse coded for mean calculation.

+ item was deleted for further analysis.
